# Supplementary material for: Synthesis of PEG-dendron for surface modification of pancreatic islets and suppression of the immune response
Source: Royal Society of Chemistry journal article supplement (doi:10.1039/d1tb00069a), 2021-01-01
Supplement: d1tb00069a1.pdf [file d1tb00069a1.pdf]

## **Supporting Information**

### **Synthesis of PEG-dendron for Surface Modification of Pancreatic Islets and Suppression of the Immune Response**

Seong Ik Jeon, Jee-Heon Jeong, Ju Eun Kim, Muhammad R. Haque, Jungahn Kim,  
Youngro Byun and Cheol-Hee Ahn\*

*\*Research Institute of Advanced Materials (RIAM), Department of Materials Science  
and Engineering, Seoul National University, 1 Gwanak-ro, Gwanak-gu, Seoul 08826,  
Republic of Korea. Email: chahn@snu.ac.kr*

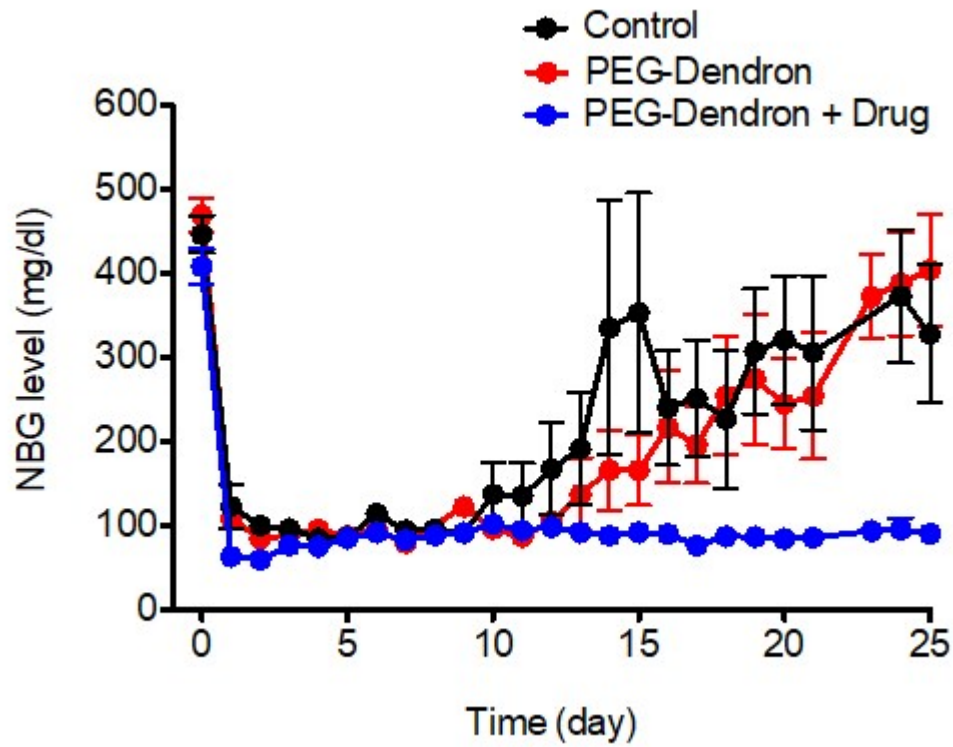

**Fig. S1.** The NBG level diabetic C57BL/6 mice, which were untreated (control), treated with PEG-dendron-shielded islet xenotransplantation, or treated with both islet transplantation and additional immunosuppressive drugs.
